# Supplementary material for: Inhibition mechanisms of AcrF9, AcrF8, and AcrF6 against type I-F CRISPR–Cas complex revealed by cryo-EM
Source: PubMed Central journal article supplement — Proc Natl Acad Sci U S A. 2020 Mar 13;117(13):7176–82. doi: 10.1073/pnas.1922638117 (PMC7132274; doi:10.1073/pnas.1922638117), 2020-03-13
Supplement: pnas.1922638117.sapp.pdf [file pnas.1922638117.sapp.pdf]

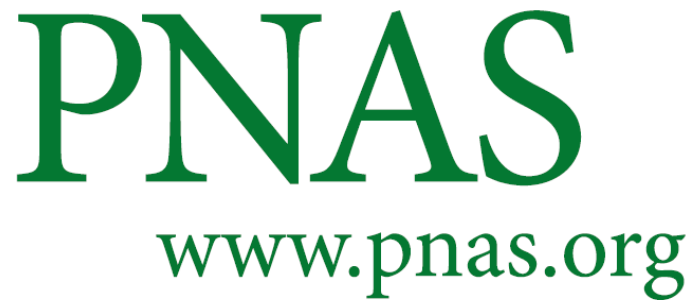

Supplementary Information Appendix for

**Inhibition Mechanisms of AcrF9, AcrF8, and AcrF6 Against Type I-F CRISPR-Cas Complex Revealed by Cryo-EM**

Kaiming Zhang<sup>1,#</sup>, Shuo Wang<sup>2,#</sup>, Shanshan Li<sup>1,#</sup>, Yuwei Zhu<sup>2,#</sup>, Grigore Pintilie<sup>1</sup>, Tung-Chung Mou<sup>3</sup>, Michael F. Schmid<sup>4</sup>, Zhiwei Huang<sup>2,\*</sup>, Wah Chiu<sup>1,4,\*</sup>

<sup>1</sup>Departments of Bioengineering, and of Microbiology and Immunology, and James H. Clark Center, Stanford University, Stanford, CA 94305 USA

<sup>2</sup>HIT Center for Life Sciences, School of Life Science and Technology, Harbin Institute of Technology, Harbin 150080, China

<sup>3</sup>Center for Biomolecular Structure and Dynamics, University of Montana, Missoula, MT 59812, USA

<sup>4</sup>CryoEM and Bioimaging Division, SSRL, SLAC National Accelerator Laboratory, Stanford University, Menlo Park, CA 94025 USA

\*Correspondence: [huangzhiwei@hit.edu.cn](mailto:huangzhiwei@hit.edu.cn) (Z.H.), [wahc@stanford.edu](mailto:wahc@stanford.edu) (W.C.)

#These authors contributed equally to this work

**This PDF file includes:**

Figs. S1 to S12

Tables S1 to S2

Movie S1

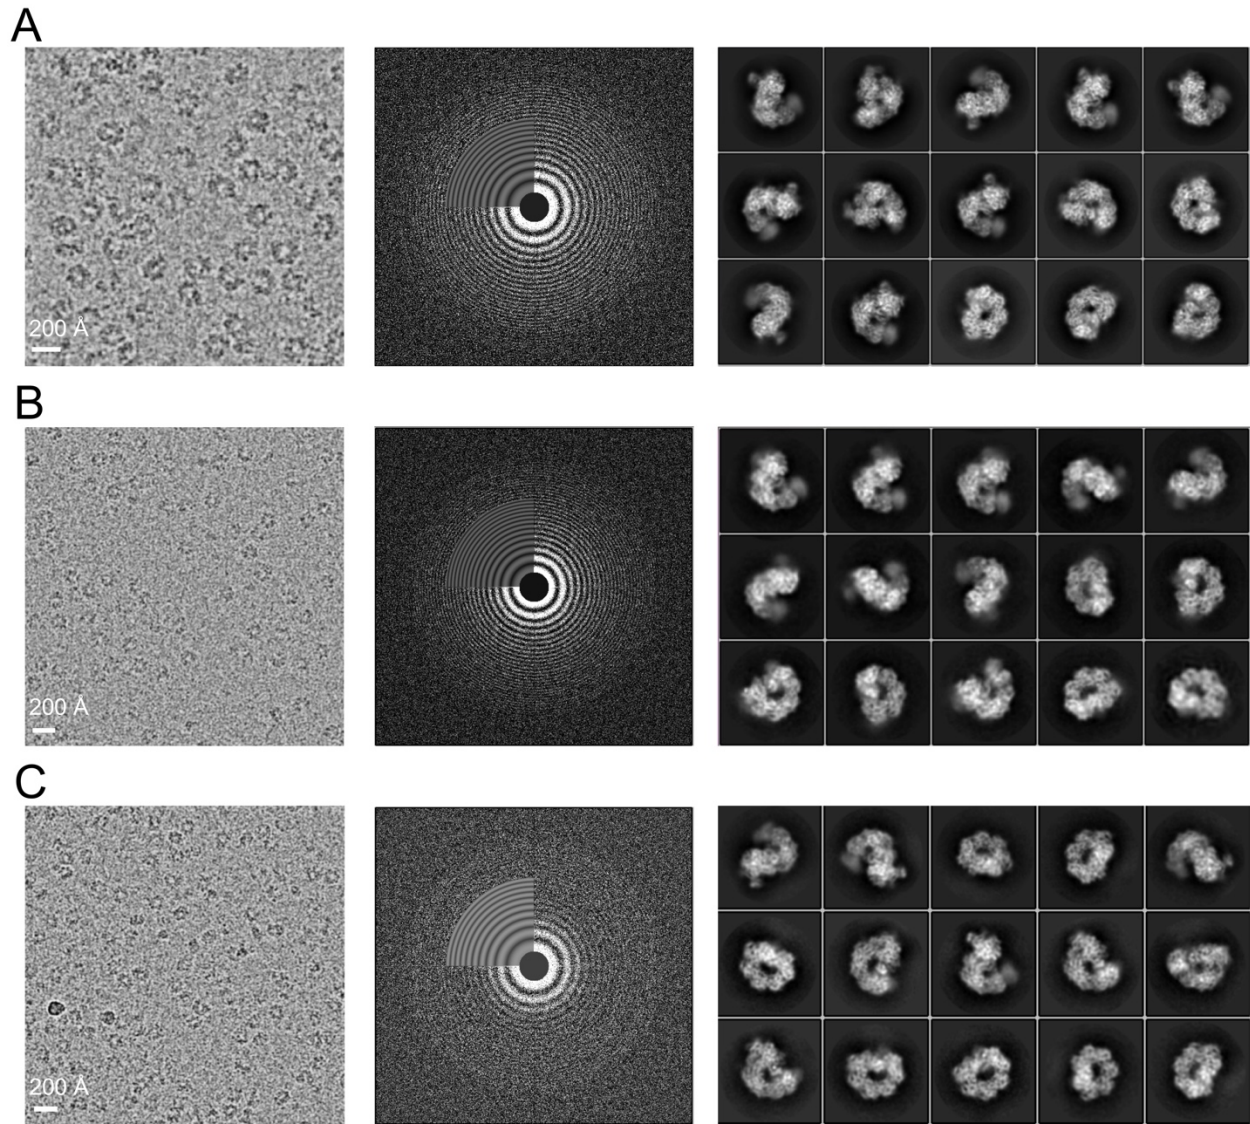

**Fig. S1.** Cryo-EM raw data and 2D analysis. (A) Csy-AcrF9 complex. Left: representative motion-corrected cryo-EM micrograph; middle: representative Fourier transform with Thon rings extending to 1.98 Å calculated by CTFFIND4; right: reference-free 2D class averages. (B) Csy-AcrF8 complex. Left: representative motion-corrected cryo-EM micrograph; middle: representative Fourier transform with Thon rings extending to 2.31 Å calculated by CTFFIND4; right: reference-free 2D class averages. (C) Csy-AcrF6 complex. Left: representative motion-corrected cryo-EM micrograph; middle: representative Fourier transform with Thon rings extending to 2.87 Å calculated by CTFFIND4; right: reference-free 2D class averages.

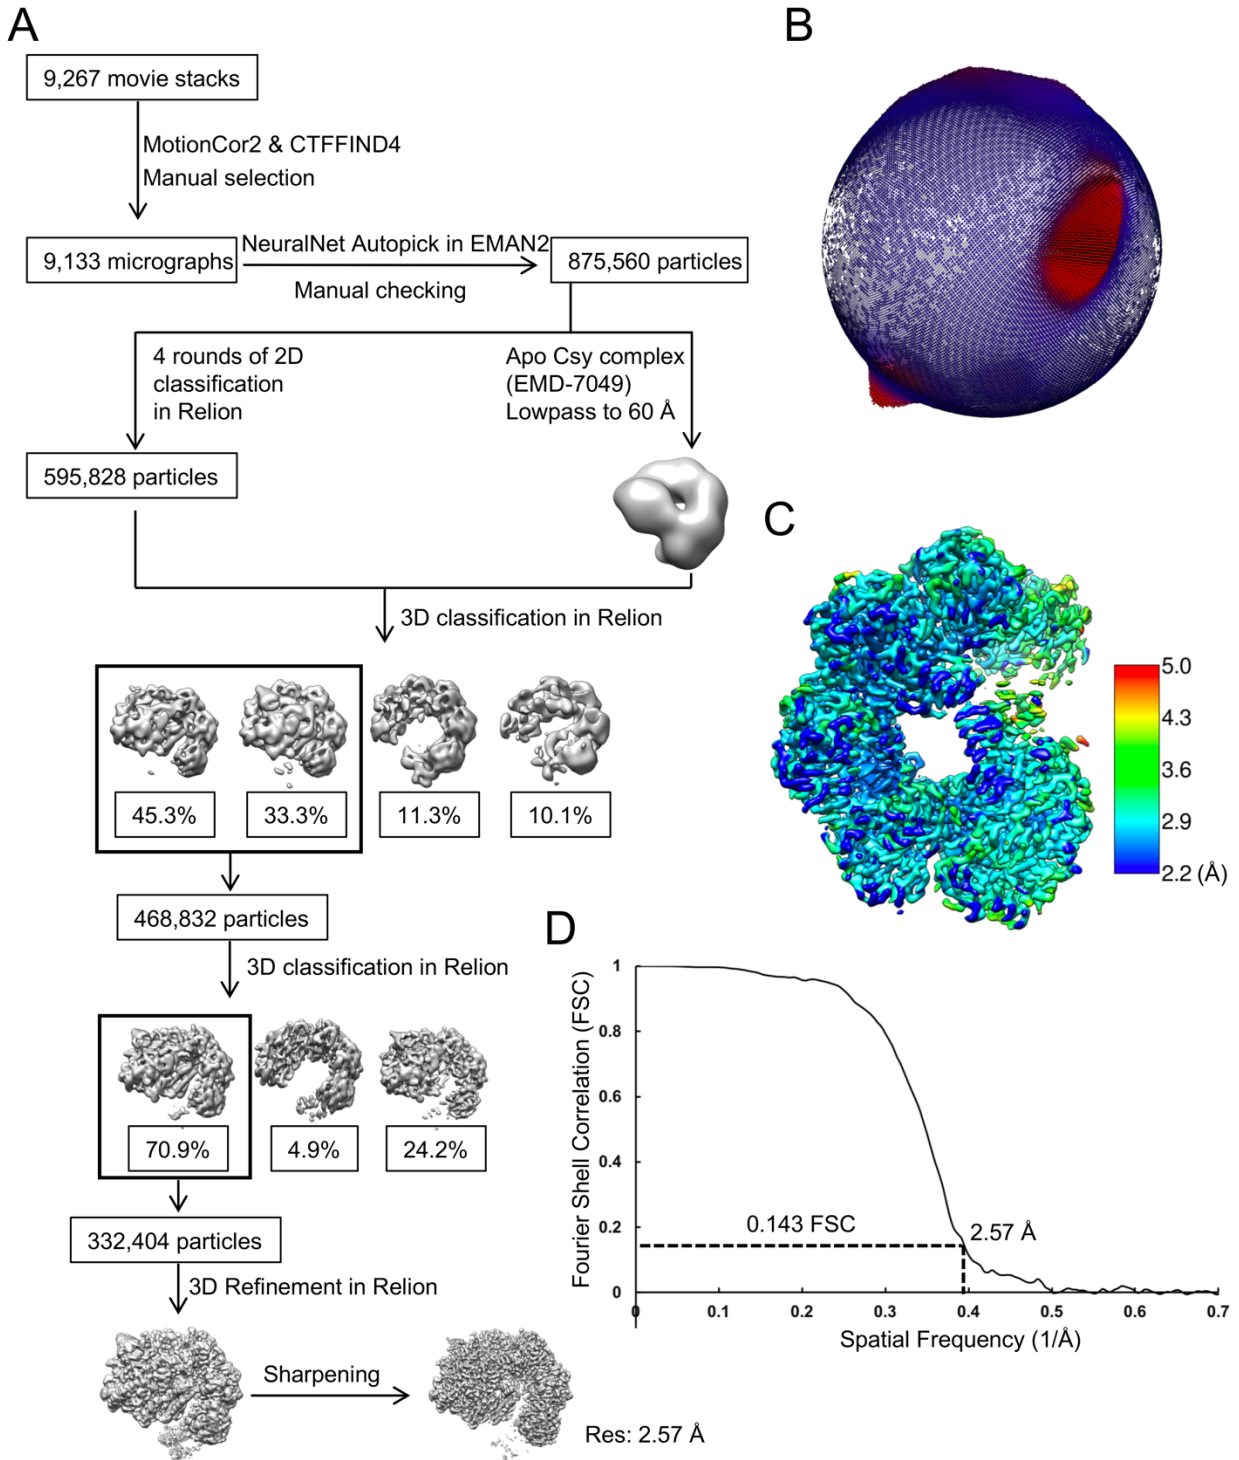

**Fig. S2.** Single-particle cryo-EM analysis of the Csy-AcrF9 complex. (A) Workflow of cryo-EM data processing. (B) Euler angle distribution of all particles used for calculating the final 3D reconstruction. (C) Resolution map for the final 3D reconstruction. (D) Gold standard FSC plot for the final 3D reconstruction.

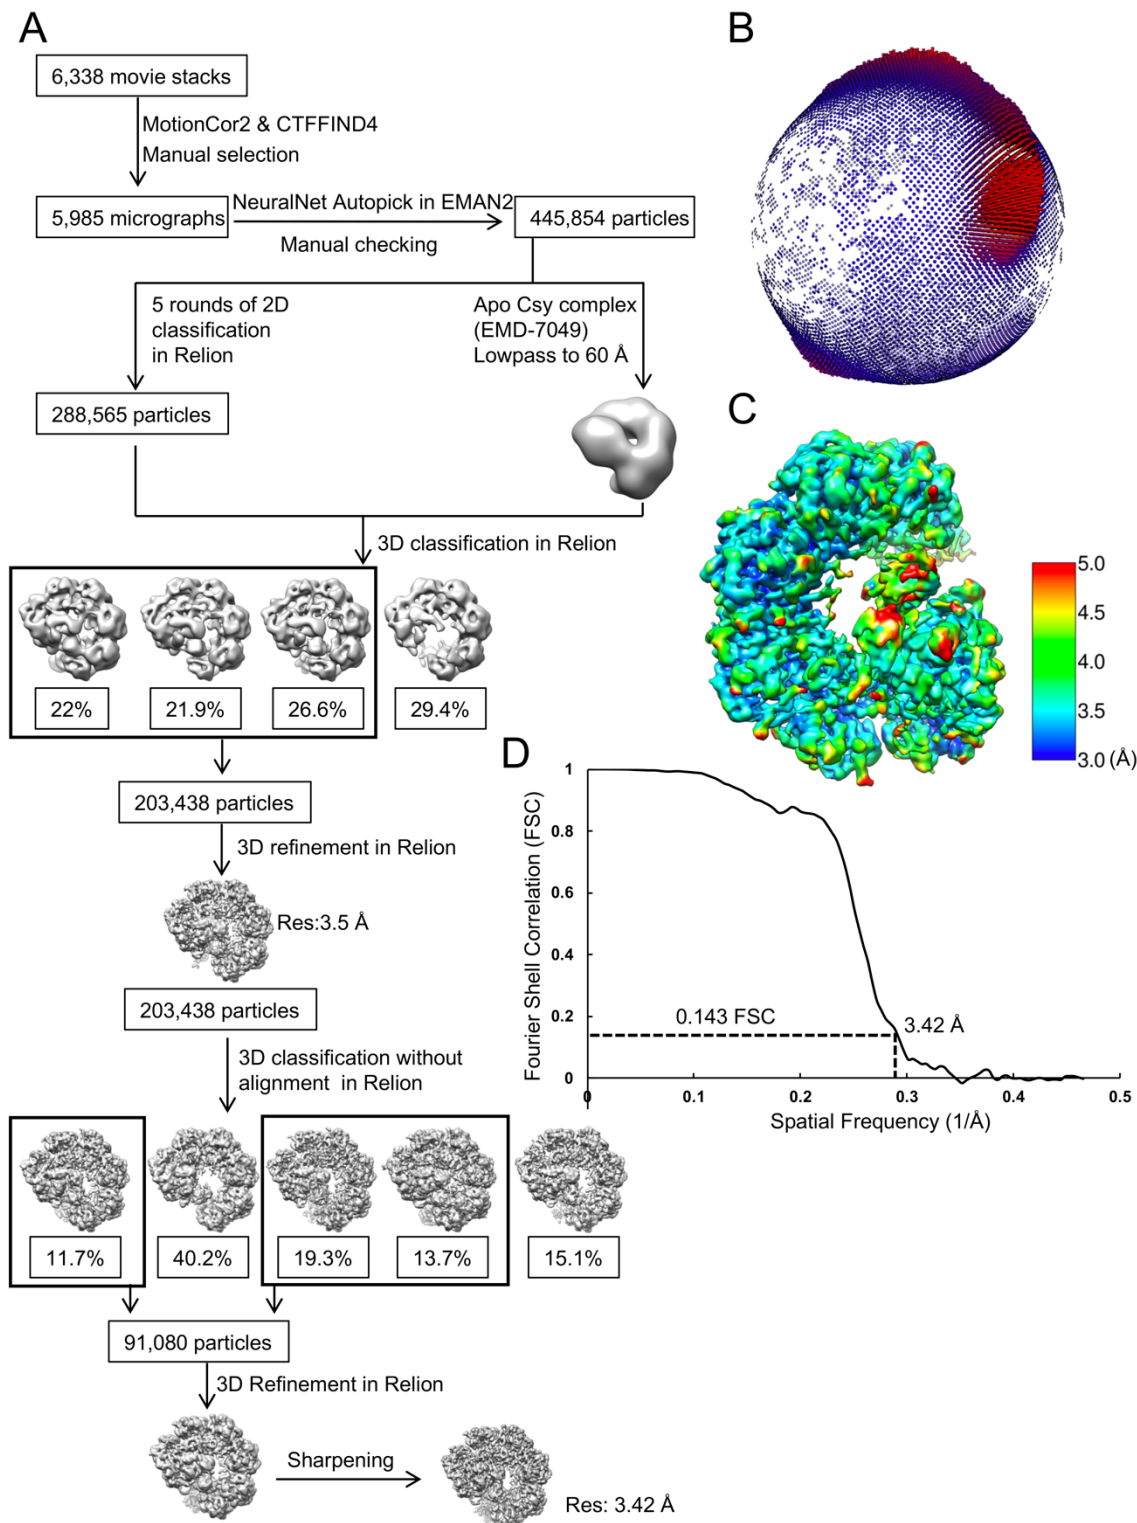

**Fig. S3.** Single-particle cryo-EM analysis of the Csy-AcrF8 complex. (A) Workflow of cryo-EM data processing. (B) Euler angle distribution of all particles used for calculating the final 3D reconstruction. (C) Resolution map for the final 3D reconstruction. (D) Gold standard FSC plot for the final 3D reconstruction.

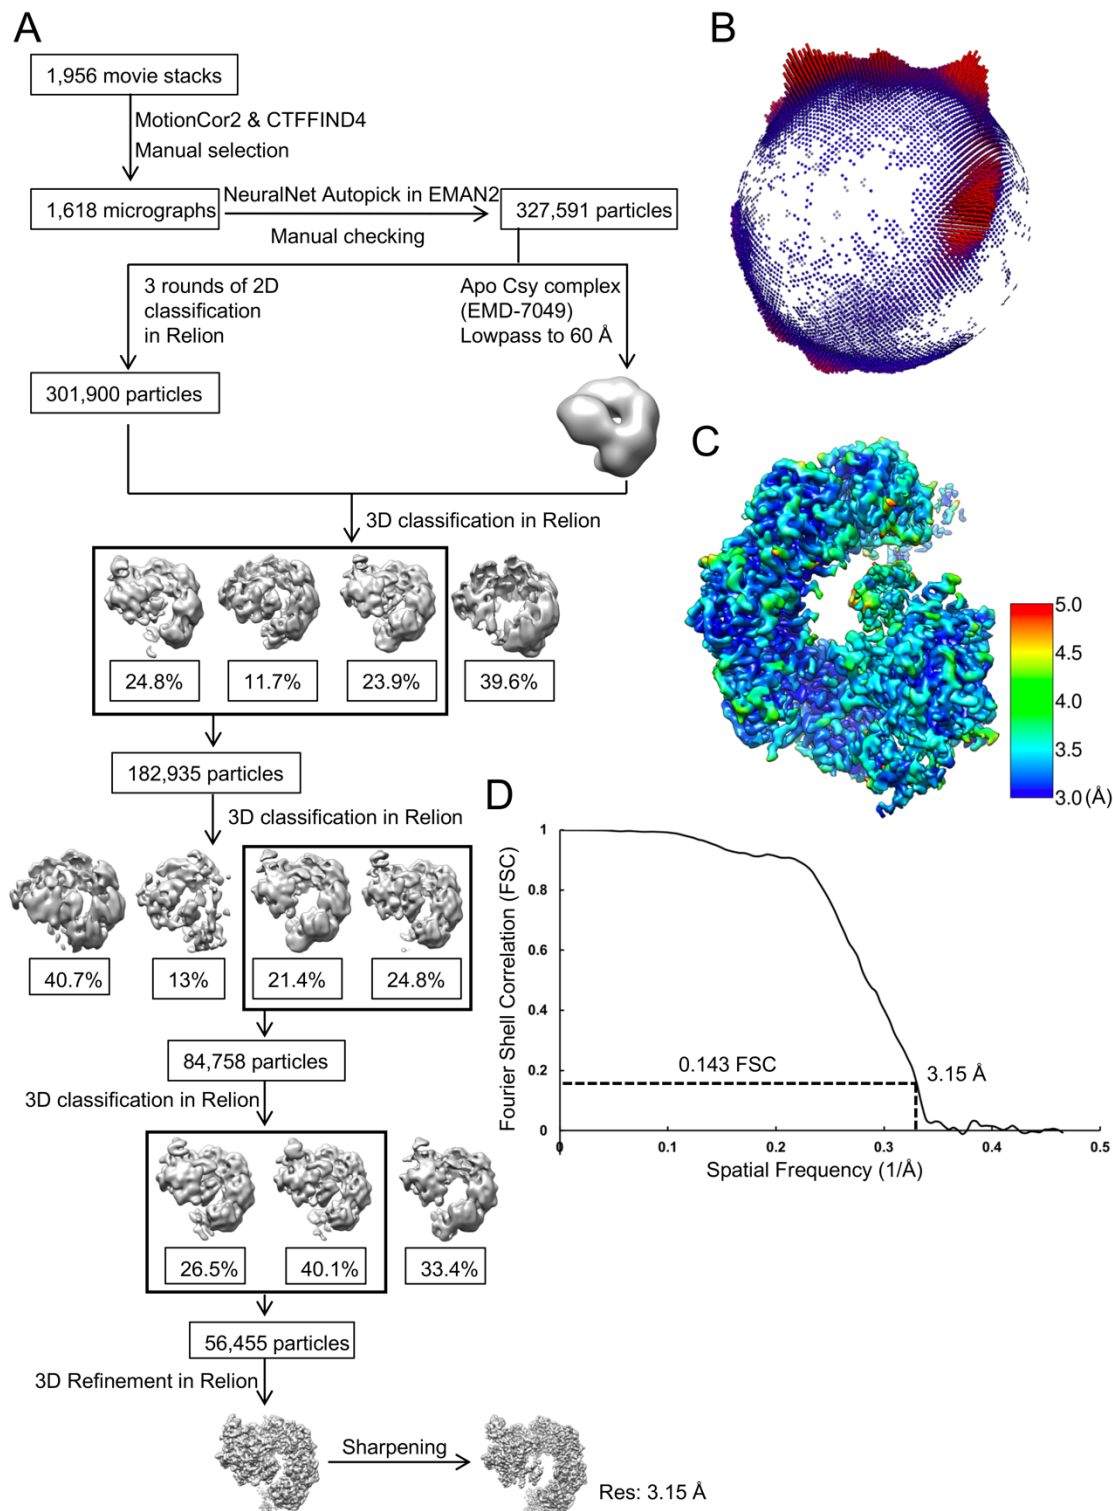

**Fig. S4.** Single-particle cryo-EM analysis of the Csy-AcrF6 complex. (A) Workflow of cryo-EM data processing. (B) Euler angle distribution of all particles used for calculating the final 3D reconstruction. (C) Resolution map for the final 3D reconstruction. (D) Gold standard FSC plot for the final 3D reconstruction.

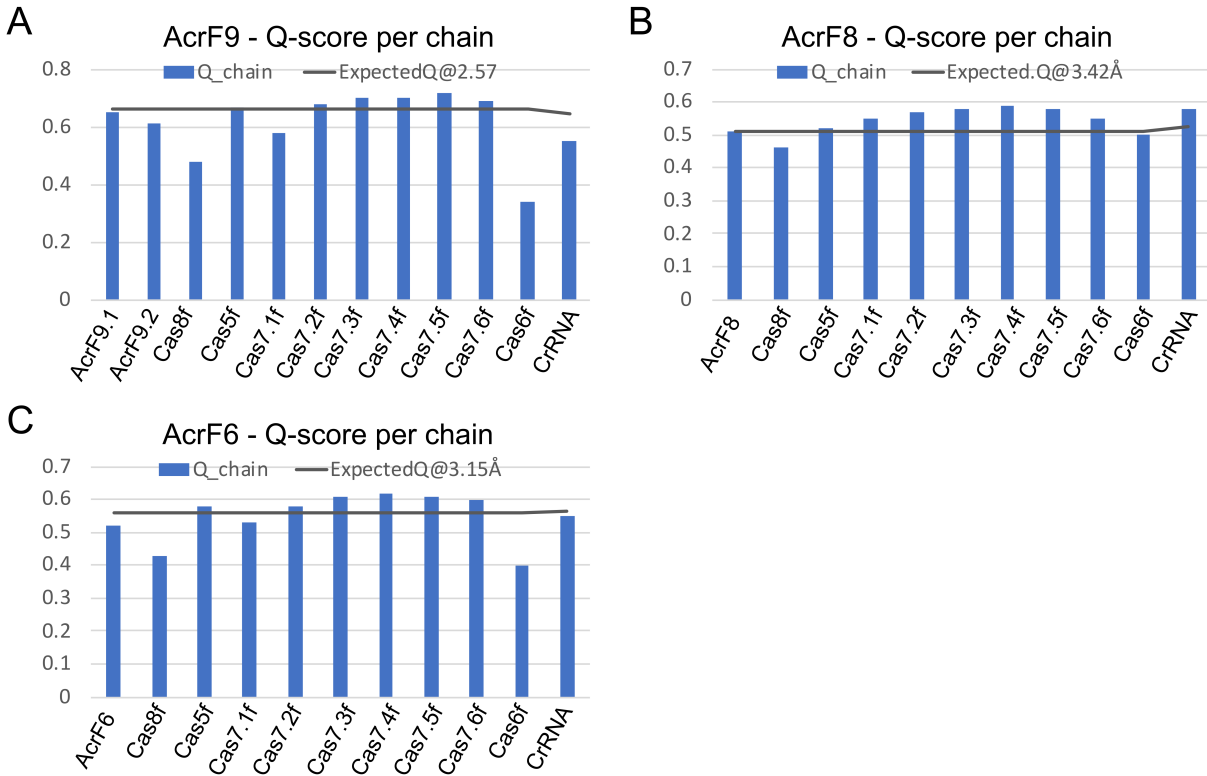

**Fig. S5.** Resolvability of the cryo-EM structures of Csy-AcrF9 (A), Csy-AcrF8 (B), and Csy-AcrF6 (C) complexes calculated by Q-score. Q-score for each chain in models and maps of the three complexes; the black line represents the expected Q-score at respective resolution based on the correlation between Q-scores and map resolution of proteins and RNAs. The higher Q-score indicates better resolvability.

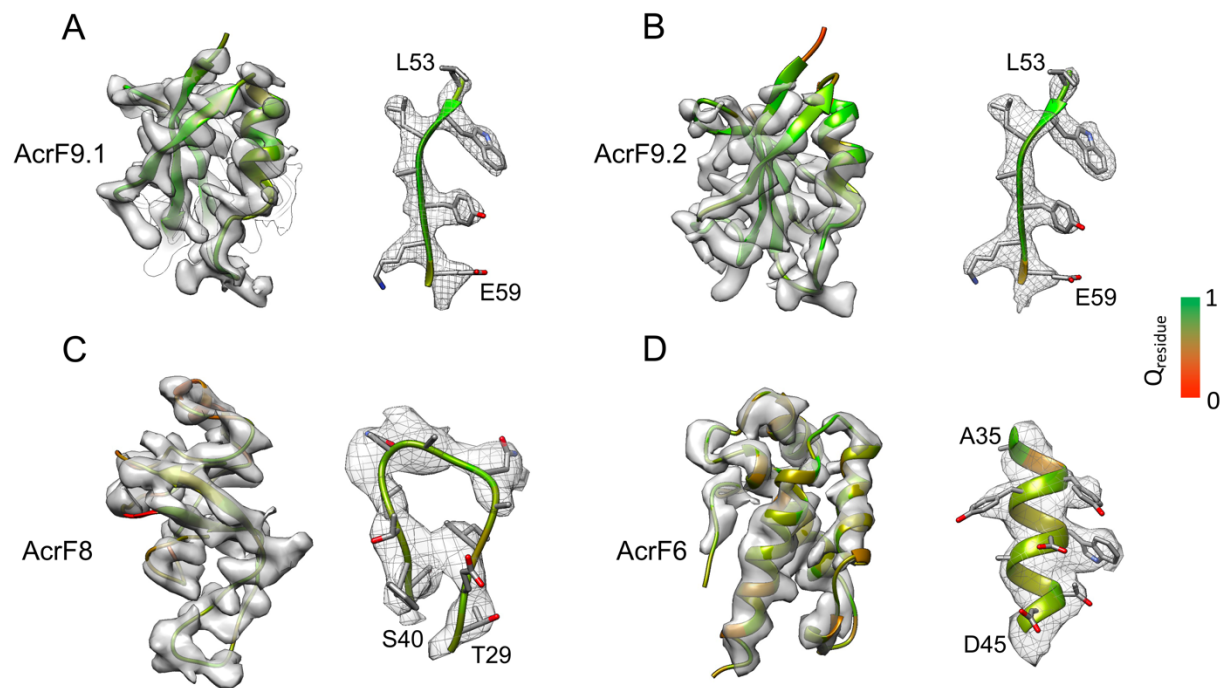

**Fig. S6.** Resolvability of the cryo-EM structures of AcrF9 (*A*, *B*), AcrF8 (*C*), and AcrF6 (*D*) calculated by Q-score. The model is shown as ribbon, with Q-scores colored. The higher Q-score indicates better resolvability. A sample density is shown on the right side.



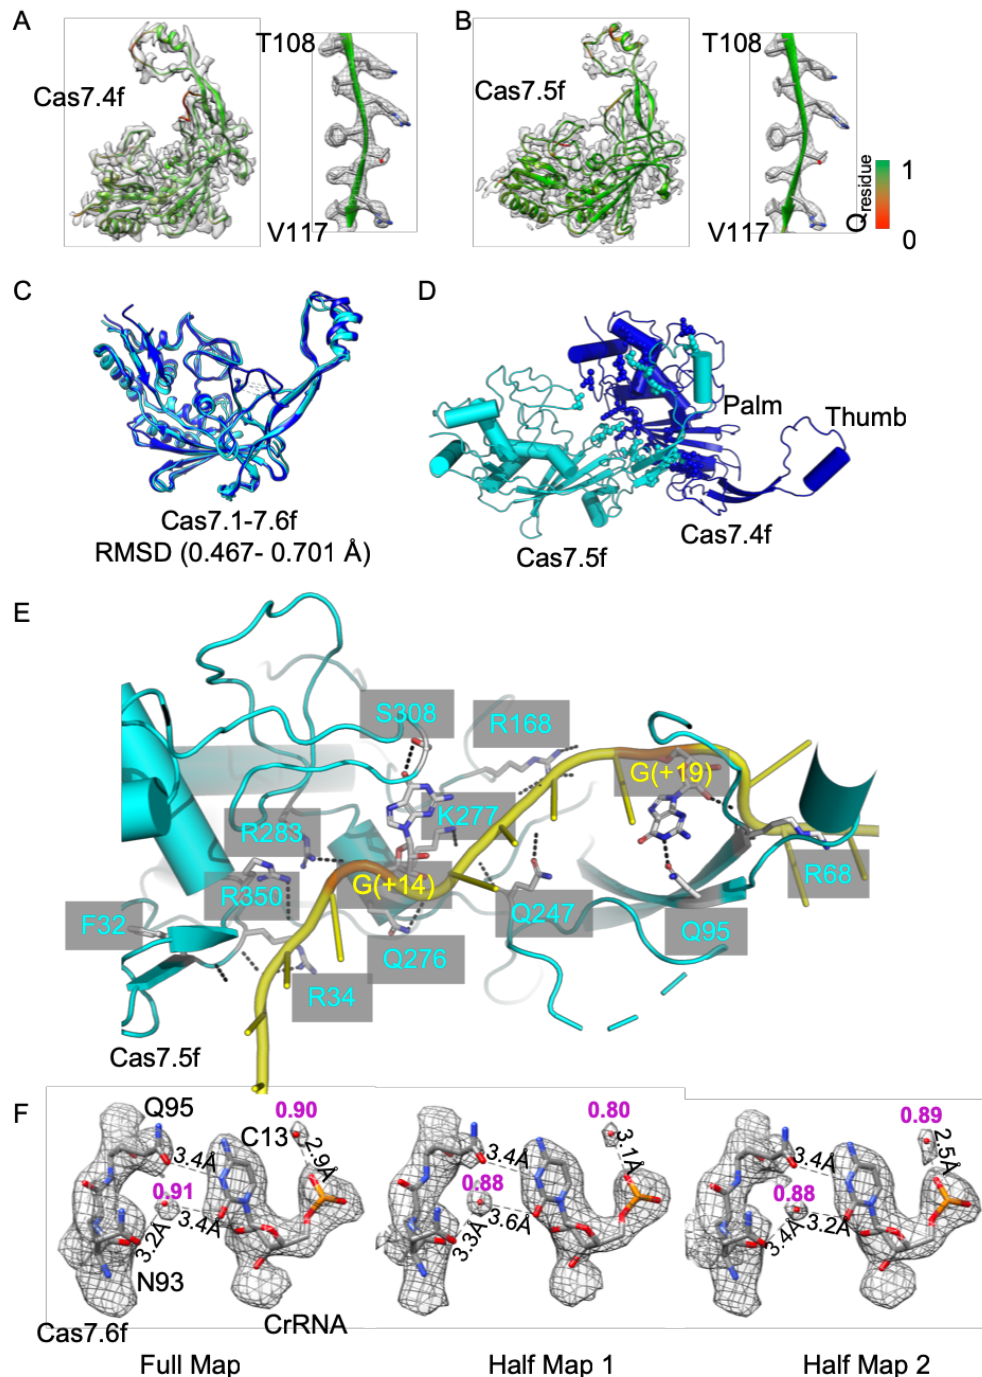

**Fig. S7.** Interfaces of Cas7f-Cas7f and Cas7f-crRNA. (*A*, *B*) Resolvability of the cryo-EM structures of Cas7.4f (*A*) and Cas7.5f (*B*) calculated by Q-score. The model is shown as ribbon, with Q-scores colored. The higher Q-score indicates better resolvability. A sample density is shown on the right side. (*C*) Superimposition of six Cas7f subunits, with the RMSD calculated. (*D*) The interface between Cas7.4f and Cas7.5f. The residues involved in the interface are listed in Table S2. (*E*) Hydrogen bonds between Cas7.5f and crRNA are shown in black dash lines. (*F*) The direct and water-mediated interactions between Cas7f proteins and crRNA. Q-scores of the waters between the map and model are calculated and shown in magenta.

GenBank ID

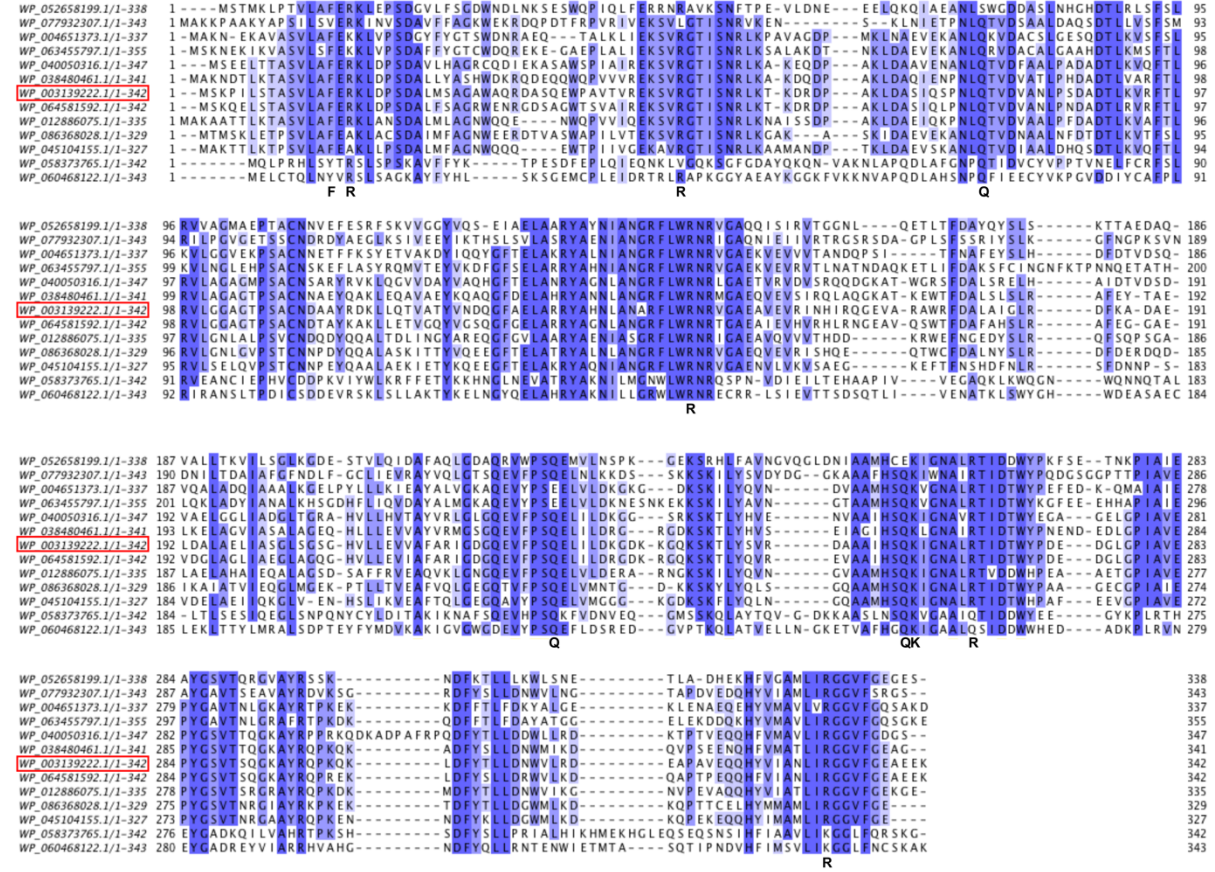

**Fig. S8.** Sequence alignment of Cas7f proteins from different species. *P. aeruginosa* used in our study is shown within red box. The residues are colored by % identity. Residues of Cas7f involved in crRNA binding are shown at bottom.

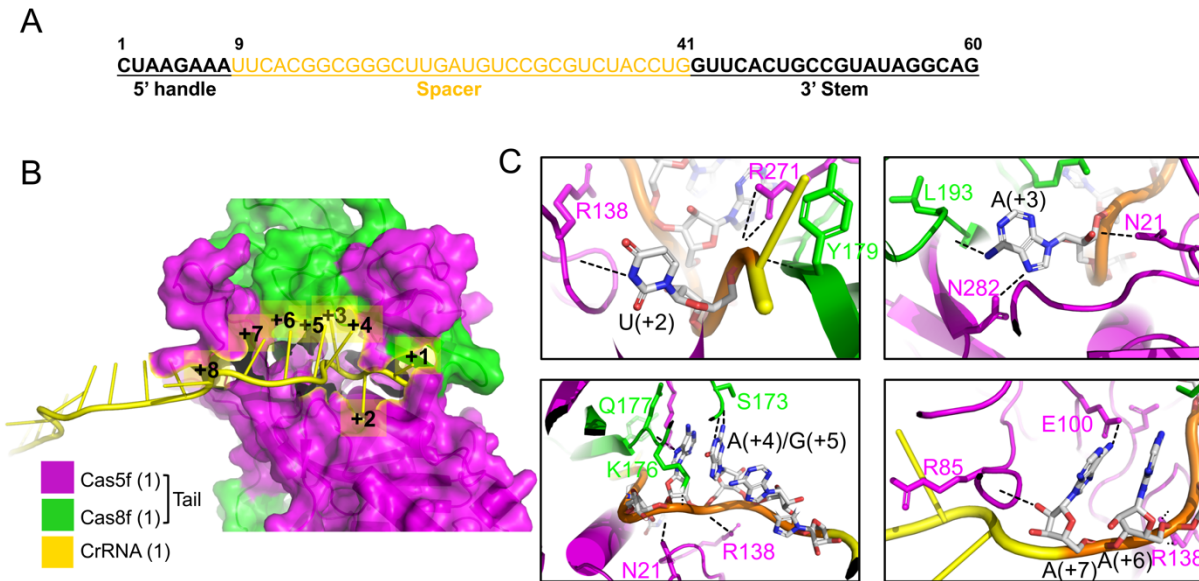

**Fig. S9.** Interaction analysis of the crRNA 5' handle and Cas5f-Cas8f. (A) Sequence of crRNA. (B) The interface between the crRNA 5' handle and Cas5f-Cas8f, where Cas5f and Cas8f are shown in surface representation. (C) Hydrogen bonds between Cas5f-Cas8f and crRNA (+2→+7) are shown in black dash lines.

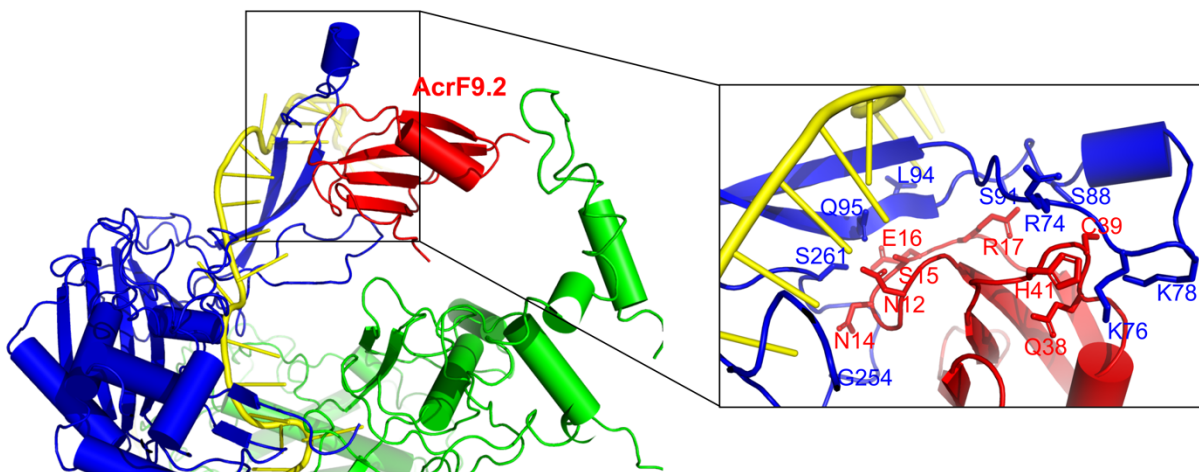

**Fig. S10.** Interface between AcrF9.2 and Cas7.6f. The residues involved in the interface are shown.

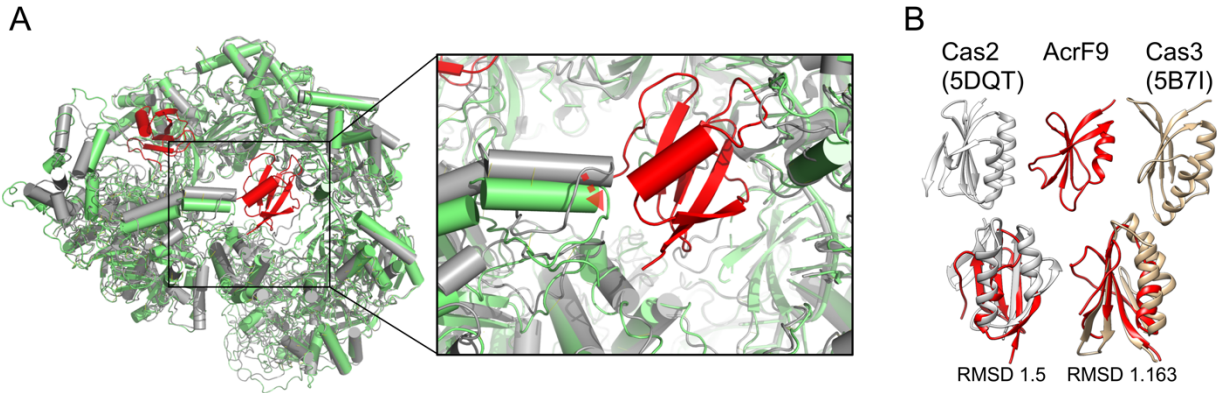

**Fig. S11.** Conformational change induced by the binding of AcrF9.1 (*A*) and superimposition of AcrF9 with Cas2/3 (*B*).

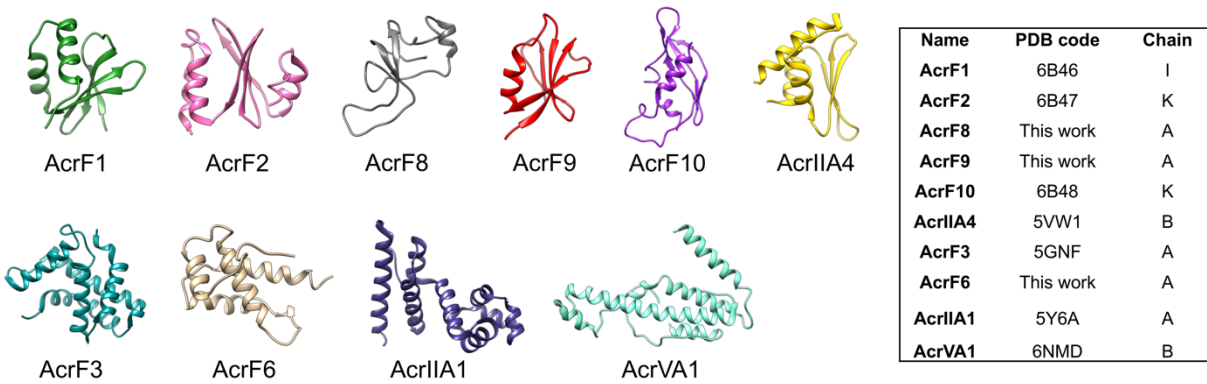

**Fig. S12.** Ribbon representation of different Acr proteins.

**Table S1. Cryo-EM data collection, processing, and model validation**

|                                           | Csy-AcrF9                | Csy-AcrF8                | Csy-AcrF6                |
|-------------------------------------------|--------------------------|--------------------------|--------------------------|
| <b>Data collection and processing</b>     |                          |                          |                          |
| Microscope                                | Titan Krios              | Titan Krios              | Titan Krios              |
| Voltage (kV)                              | 300                      | 300                      | 300                      |
| Camera                                    | Gatan K2 Summit          | Gatan K2 Summit          | Gatan K2 Summit          |
| Pixel size (Å)                            | 0.65                     | 1.06                     | 1.06                     |
| Total Dose (e-/Å <sup>2</sup> )           | 56                       | 42                       | 42                       |
| Exposure time (s)                         | 6                        | 6                        | 6                        |
| Number of frames per exposure             | 30                       | 30                       | 30                       |
| Defocus range during data collection (µm) | -0.6 - -2.7              | -0.6 - -3.6              | -0.9 - -2.4              |
| Number of micrographs                     | 9,267                    | 6,338                    | 1,956                    |
| Number of initial particles               | 875,560                  | 445,854                  | 327,591                  |
| Number of particles for 3D analyses       | 595,828                  | 288,565                  | 301,900                  |
| Symmetry                                  | C1                       | C1                       | C1                       |
| Number of final particles                 | 332,404                  | 91,080                   | 56,455                   |
| Defocus range after data processing (µm)  | -0.3 - -3.1              | -0.5 - -3.7              | -1.1 - -2.5              |
| Resolution (0.143 FSC, Å)                 | 2.57                     | 3.42                     | 3.15                     |
| <b>Atomic model refinement</b>            |                          |                          |                          |
| Software                                  | phenix.real_space_refine | phenix.real_space_refine | phenix.real_space_refine |
| Clashscore, all atoms                     | 5.11                     | 7.83                     | 6.61                     |
| <b>Protein geometry</b>                   |                          |                          |                          |
| Poor rotamers (%)                         | 1.16                     | 0.57                     | 0.04                     |
| Favored rotamers (%)                      | 95.45                    | 84.51                    | 98.07                    |
| Ramachandran outliers (%)                 | 0.07                     | 0                        | 0.03                     |
| Ramachandran favored (%)                  | 91.31                    | 86.93                    | 91.24                    |
| MolProbity score                          | 1.83                     | 2.05                     | 1.88                     |
| Bad bonds (%)                             | 0.06                     | 0.01                     | 0                        |
| Bad angles (%)                            | 0.11                     | 0.01                     | 0.04                     |
| <b>Nucleic acid geometry</b>              |                          |                          |                          |
| Probably wrong sugar puckers (%)          | 1.67                     | 0                        | 0                        |
| Bad bonds (%)                             | 0                        | 0                        | 0                        |
| Bad angles (%)                            | 0                        | 0                        | 0                        |

**Table S2. The residues involved in the formation of hydrogen bonds and salt bridges between Cas7.4f and Cas7.5f subunits of the Csy complex**

| Hydrogen bonds | Cas7.4f |     |         | Cas7.5f |     |         |
|----------------|---------|-----|---------|---------|-----|---------|
|                | Atom    | Res | Res no. | Atom    | Res | Res no. |
|                | NH2     | ARG | 34      | OE1     | GLU | 242     |
|                | OD2     | ASP | 40      | NH2     | ARG | 63      |
|                | NH1     | ARG | 112     | O       | SER | 104     |
|                | O       | THR | 114     | NE2     | GLN | 241     |
|                | OG1     | THR | 114     | O       | ASP | 239     |
|                | OG1     | THR | 114     | NE2     | GLN | 241     |
|                | NH1     | ARG | 116     | O       | GLY | 172     |
|                | N       | CYS | 127     | O       | SER | 308     |
|                | OE1     | GLU | 248     | OG      | SER | 66      |
|                | OE2     | GLU | 248     | N       | SER | 66      |
|                | N       | LEU | 249     | OG      | SER | 66      |
|                | OH      | TYR | 265     | NH1     | ARG | 63      |
|                | OE1     | GLN | 276     | NZ      | LYS | 65      |
|                | NE2     | GLN | 276     | O       | SER | 66      |
|                | NZ      | LYS | 317     | OD1     | ASP | 81      |
|                | OH      | TYR | 323     | O       | SER | 72      |
| Salt bridges   | OE2     | GLU | 33      | NE      | ARG | 168     |
|                | NH2     | ARG | 34      | OE1     | GLU | 242     |
|                | OD2     | ASP | 40      | NH2     | ARG | 63      |
|                | NH2     | ARG | 112     | OD2     | ASP | 239     |
|                | NZ      | LYS | 317     | OD1     | ASP | 81      |
|                | OD2     | ASP | 327     | NH1     | ARG | 74      |
|                | OE2     | GLU | 356     | NE      | ARG | 74      |

**Csy-AcrF9 Complex**  
(Acr: Anti-CRISPR)  
Cryo-EM Reconstruction  
2.57Å Resolution

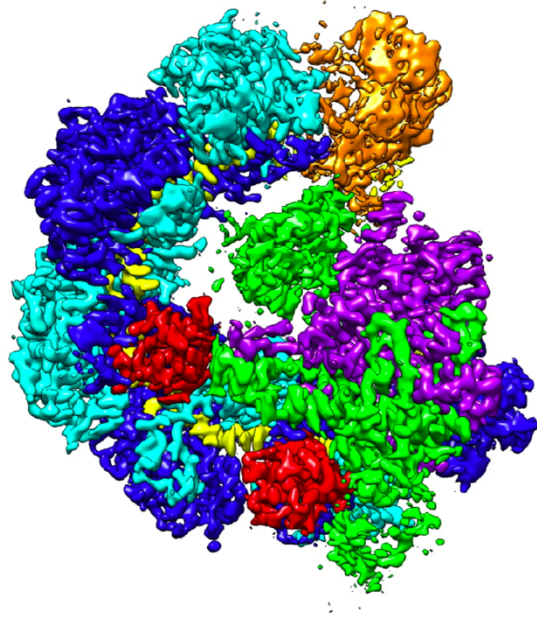

**Movie S1.** Overall structure (map and model) of the Type I-F CRISPR-Csy complex bound with two copies of AcrF9.
